# Supplementary material for: Room temperature hydrogen storage enhancement in copper-doped zeolitic imidazolate frameworks with trioctylamine
Source: Royal Society of Chemistry journal article supplement (doi:10.1039/d3se00277b), 2023-01-01
Supplement: d3se00277b1.pdf [file d3se00277b1.pdf]

## Supplementary Information

### Room temperature hydrogen storage enhancement in copper-doped zeolitic imidazolate frameworks with trioctylamine

Syedvali Pinjari<sup>a,b</sup>, Tapan Bera<sup>b</sup>, Erik Kjeang<sup>a,\*</sup>

<sup>a</sup>Fuel Cell Research Laboratory, Simon Fraser University, 250-13450 102 Avenue, Surrey, BC V3T0A3, Canada

<sup>b</sup>Alternative Energy, Indian Oil R&D Centre, Sector-13, Faridabad, 121002, India

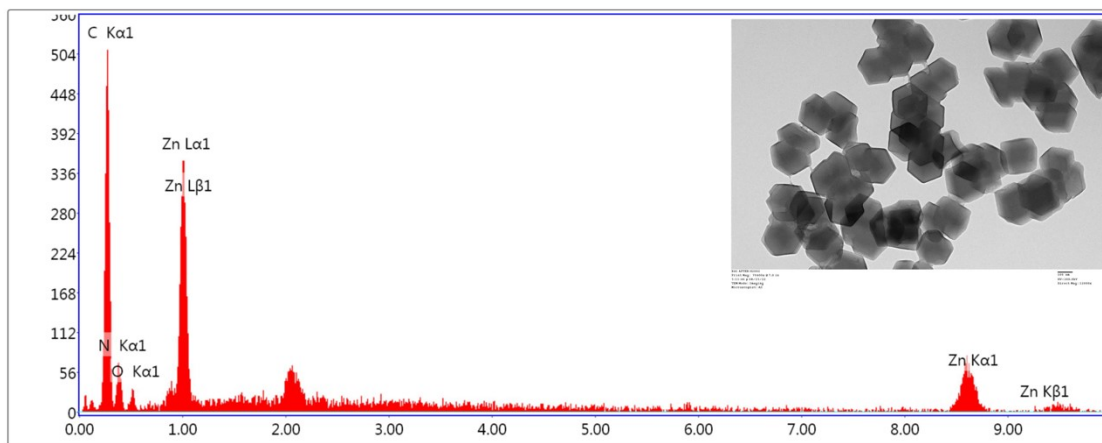

Lsec: 30.0 0 Cnts 0.000 keV Det: Octane Prime Det

**Figure S1 EDX spectrum of ZIF-8.**

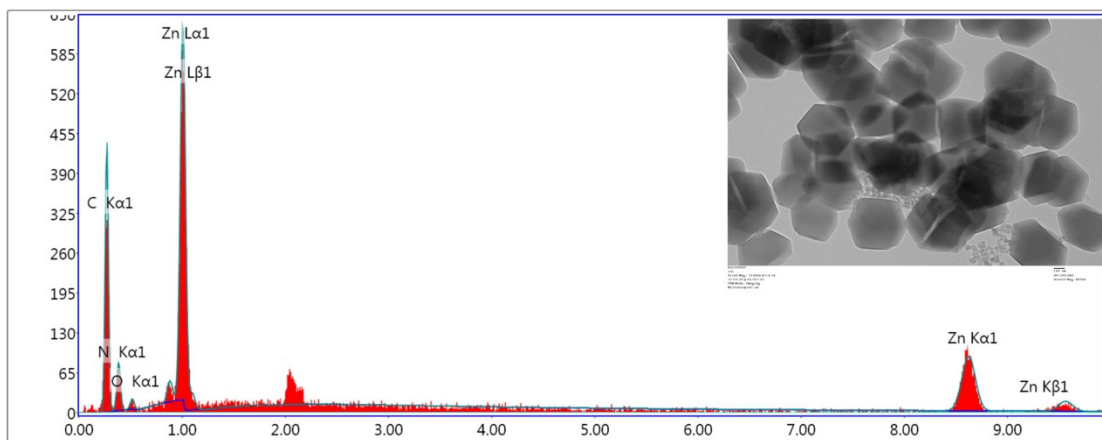

Lsec: 30.0 0 Cnts 0.000 keV Det: Octane Prime Det

**Figure S2 EDX spectrum of ZIF-8-T.**

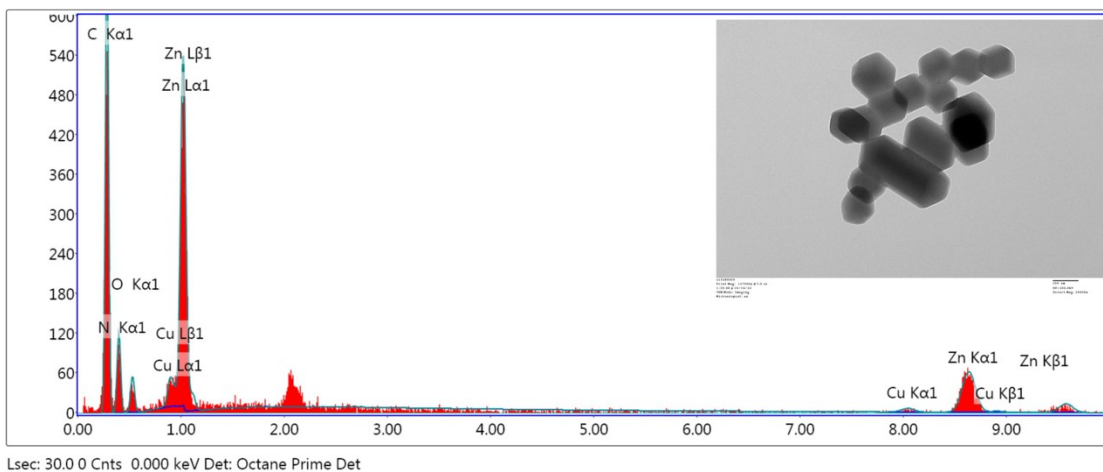

**Figure S3 EDX spectrum of CuZIF-8.**

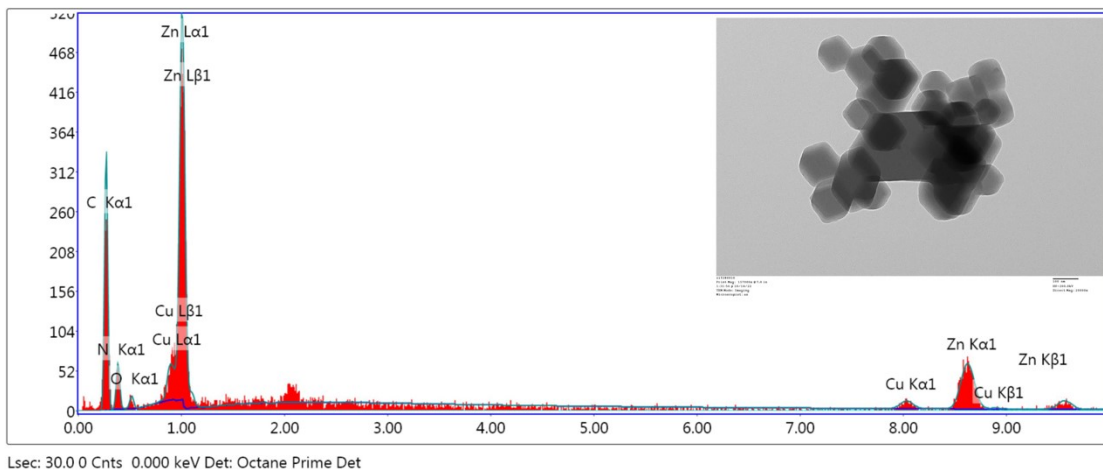

**Figure S4 EDX spectrum of CuZIF-8-T.**

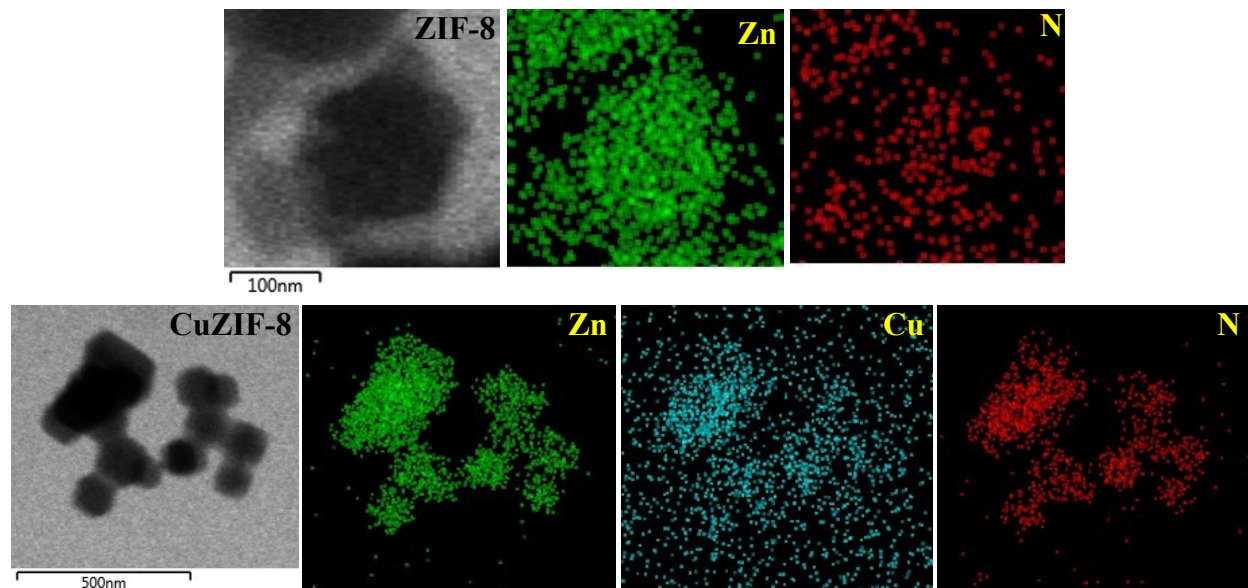

Figure S5 Elemental mapping of ZIF-8 and CuZIF-8 from TEM/EDX.

Table S1 Particle size and product yield of all four materials.

| Samples   | Particle size range (nm) | Average particle size (nm) | Product yield (%) |
|-----------|--------------------------|----------------------------|-------------------|
| ZIF-8     | 100 – 320                | 252                        | 90.21             |
| ZIF-8-T   | 100 – 558                | 474                        | 93.40             |
| CuZIF-8   | 100 – 186                | 159                        | 86.78             |
| CuZIF-8-T | 100 – 275                | 152                        | 89.74             |

Table S2 Elemental composition of the adsorbents from XPS survey spectra.

| Samples   | C1s  | N1s  | O1s | Zn2p | Cu2p |
|-----------|------|------|-----|------|------|
| ZIF-8     | 66.4 | 20.7 | 6.6 | 6.3  | -    |
| ZIF-8-T   | 65.6 | 21.4 | 5.7 | 7.3  | -    |
| CuZIF-8   | 68.5 | 17.1 | 7.7 | 5.6  | 1.1  |
| CuZIF-8-T | 68.1 | 22.4 | 2.4 | 6.1  | 1    |

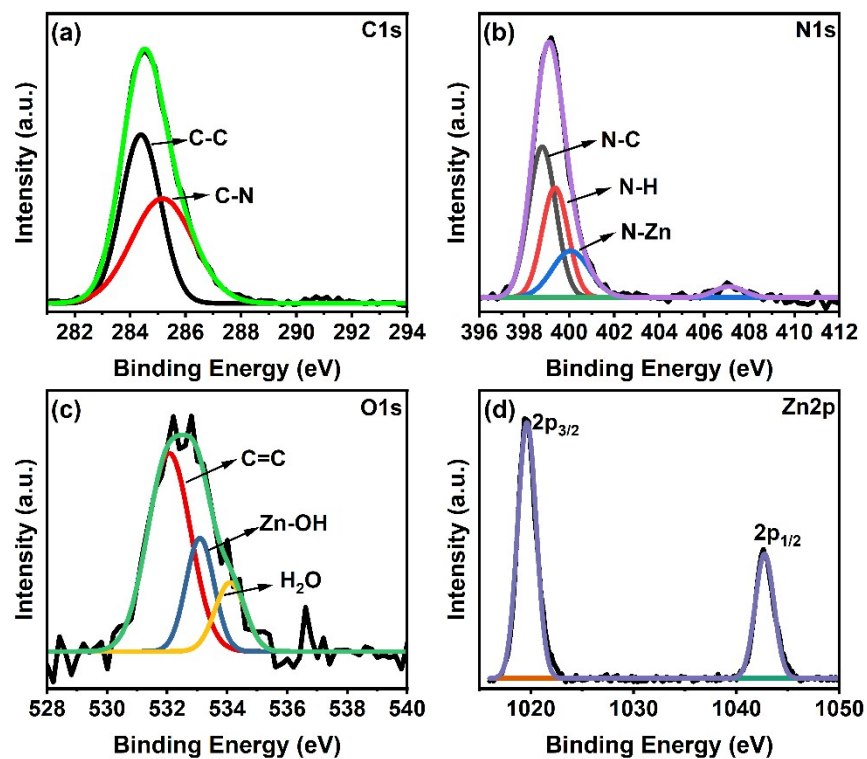

Figure S6 Deconvoluted high-resolution XPS spectra of ZIF-8.

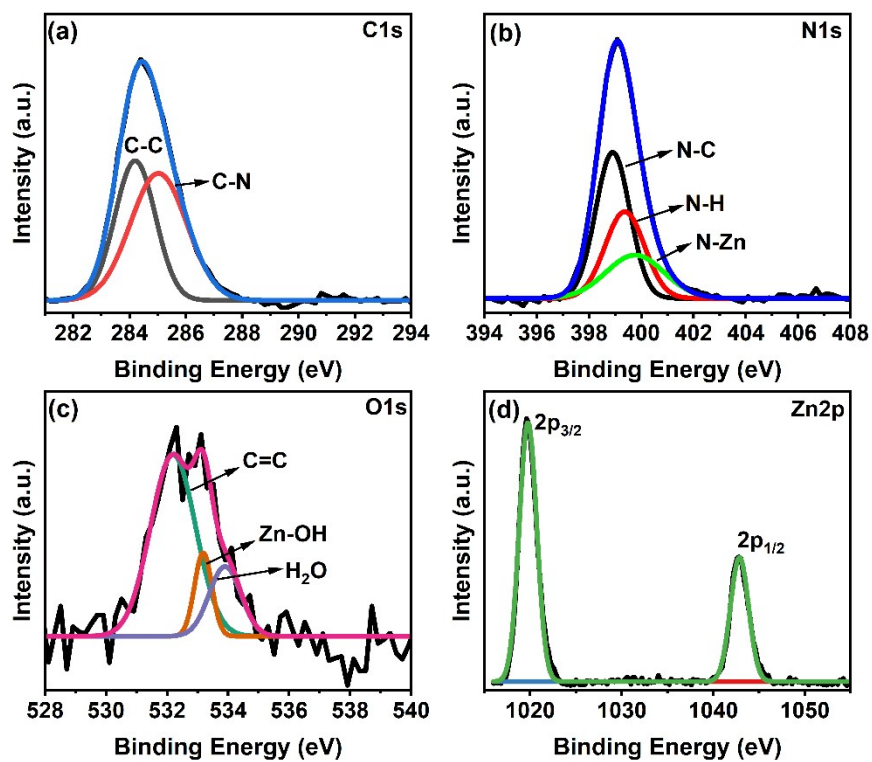

Figure S7 Deconvoluted high-resolution XPS spectra of ZIF-8-T.

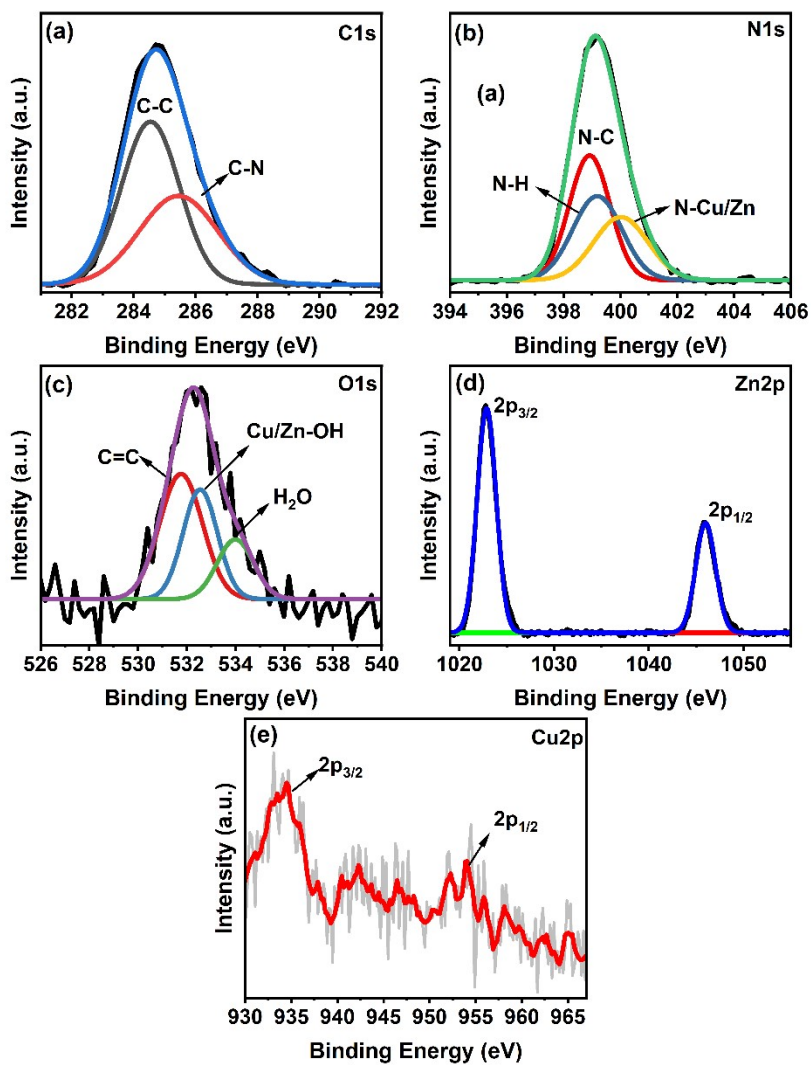

Figure S8 Deconvoluted high-resolution XPS spectra of CuZIF-8.

**Table S3 Fitting results of deconvoluted high-resolution XPS spectra given in at. %, with binding energy mentioned in parenthesis.**

| Samples   | C1s             |                 |                | N1s             |                 |                 |                | O1s             |                   |                  |
|-----------|-----------------|-----------------|----------------|-----------------|-----------------|-----------------|----------------|-----------------|-------------------|------------------|
|           | C-C             | C-N             | $\pi-\pi^*$    | N-C             | N-H             | N-Zn or<br>N-Cu | Extra N        | C=C             | Zn-OH or<br>Cu-OH | H <sub>2</sub> O |
| ZIF-8     | 50.9<br>(284.3) | 49.1<br>(285.1) | -              | 45.4<br>(398.8) | 31.8<br>(399.4) | 19.3<br>(400.1) | 3.6<br>(407.1) | 61.9<br>(532.1) | 23.0<br>(533.0)   | 15.1<br>(534.1)  |
| ZIF-8-T   | 44.1<br>(284.2) | 55.9<br>(285.0) | -              | 45.7<br>(398.9) | 31.3<br>(399.3) | 23.0<br>(399.8) | -              | 69.0<br>(532.2) | 12.3<br>(533.1)   | 18.8<br>(533.9)  |
| CuZIF-8   | 57.6<br>(284.5) | 42.4<br>(285.4) | -              | 44.2<br>(398.9) | 34.6<br>(399.2) | 21.2<br>(400.0) | -              | 47.4<br>(531.8) | 33.3<br>(532.5)   | 19.2<br>(533.9)  |
| CuZIF-8-T | 48.4<br>(284.6) | 48.7<br>(285.3) | 2.9<br>(291.6) | 57.3<br>(399.0) | 17.2<br>(399.5) | 25.5<br>(400.5) | -              | 17.6<br>(531.3) | 36.0<br>(532.3)   | 46.5<br>(533.1)  |

**Table S4 Fitting results of deconvoluted high-resolution XPS spectra of Zn2p. The values are in at. %, with binding energy mentioned in parenthesis.**

| Sample    | Zn2p          |               |
|-----------|---------------|---------------|
|           | Zn2p3/2       | Zn2p1/2       |
| ZIF-8     | 66.9 (1019.6) | 33.1 (1042.7) |
| ZIF-8-T   | 66.7 (1019.7) | 33.3 (1042.8) |
| CuZIF-8   | 66.3 (1022.9) | 33.7 (1045.9) |
| CuZIF-8-T | 67.2 (1022.8) | 32.8 (1045.9) |

Table S5 TGA and DTG results of the synthesized materials.

| Samples   | Temperature (°C) |            |          | Yield (wt.%) |
|-----------|------------------|------------|----------|--------------|
|           | Onset            | Inflection | Endpoint |              |
| ZIF-8     | 432.2            | 466.1      | 530.0    | 34.8         |
| ZIF-8-T   | 437.3            | 485.4      | 575.9    | 33.4         |
| CuZIF-8   | 442.1            | 488.2      | 617.9    | 34.2         |
| CuZIF-8-T | 423              | 536.6      | 564.4    | 34.9         |

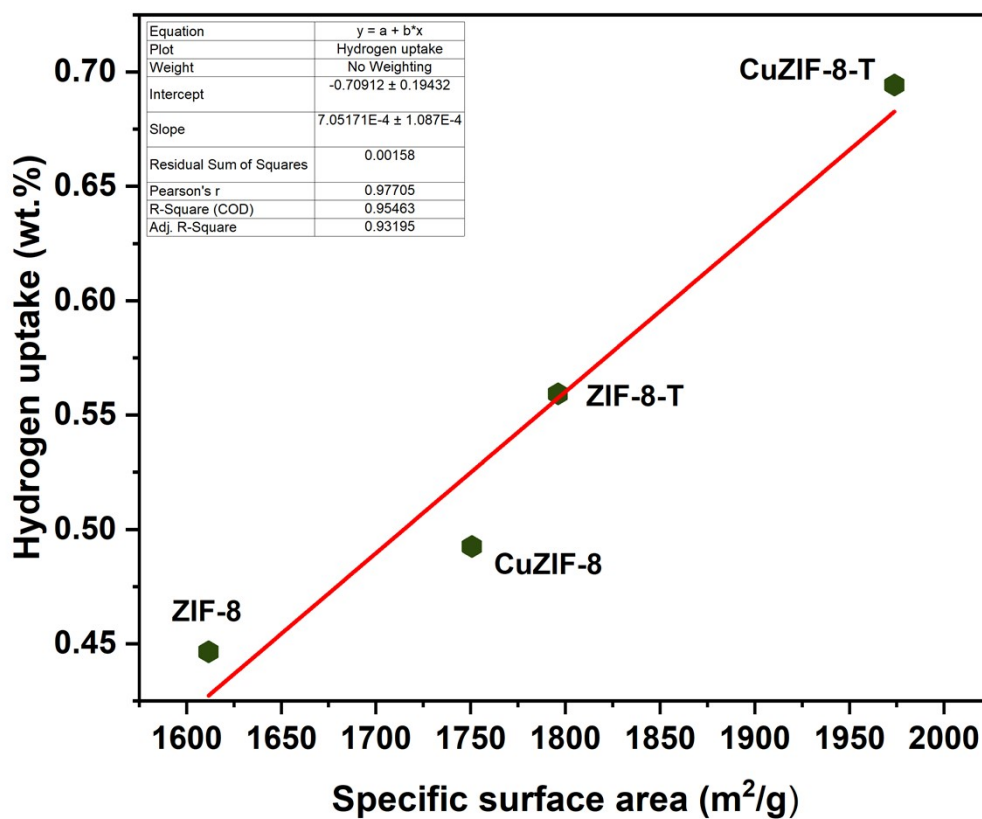

Figure S9 Linear trend between hydrogen uptake and specific surface area for the four samples.
